# Supplementary material
Source: PubMed Central journal article supplement (PMC7265249)
Supplement: EMBJ-39-e103285-s001.pdf [file EMBJ-39-e103285-s001.pdf]

## ***SIRT5* impairs aggregation and activation of the signaling adaptor MAVS through catalyzing lysine desuccinylation**

Xing Liu<sup>1, †</sup>, Chunchun Zhu<sup>1, 4, †</sup>, Huangyuan Zha<sup>1</sup>, Jinhua Tang<sup>1, 4</sup>, Fangjing Rong<sup>1, 4</sup>, Xiaoyun Chen<sup>1, 4</sup>, Sijia Fan<sup>1, 4</sup>, Chenxi Xu<sup>1</sup>, Juan Du<sup>1</sup>, Junji Zhu<sup>1, 4</sup>, Jing Wang<sup>1</sup>, Gang Ouyang<sup>1</sup>, Guangqing Yu<sup>1, 4</sup>, Xiaolian Cai<sup>1</sup>, Zhu Chen<sup>1</sup>, and Wuhan Xiao<sup>1, 2, 3, 4, 5, \*</sup>

<sup>1</sup> State Key Laboratory of Freshwater Ecology and Biotechnology, Institute of Hydrobiology, Chinese Academy of Sciences; <sup>2</sup> The Key Laboratory of Aquaculture Disease Control, Ministry of Agriculture; <sup>3</sup> The Key Laboratory of Aquatic Biodiversity and Conservation, Institute of Hydrobiology, Chinese Academy of Sciences; Wuhan, 430072, P. R. China. <sup>4</sup> University of Chinese Academy of Sciences, Beijing, 100049, P. R. China. <sup>5</sup> The Innovation Academy of Seed Design, Chinese Academy of Sciences, Wuhan, P. R. China.

## **APPENDIX**

### **Table of Contents:**

Appendix Figure Legend: Pages 2 – 4

Appendix Figure S1 – Page 5.

Appendix Figure S2 – Page 6

Appendix Figure S3 – Page 7

Appendix Figure S4 – Page 8

Appendix Figure S5 – Page 9

Appendix Figure S6 – Page 10

Appendix Figure S7 – Page 11

Appendix Table S1 – Page 12 - 14

Appendix Table S2 – Page 15

**Appendix Figure S1. Western blot analysis for protein expression in Figure 1.**

- A Western blot analysis for Figure 1A.
- B Western blot analysis for Figure 1B.
- C Western blot analysis for Figure 1C.
- D Western blot analysis for Figure 1D.
- E Western blot analysis for Figure 1E.
- F Western blot analysis for Figure 1F.
- G Western blot analysis for Figure 1G.
- H Western blot analysis for Figure 1H.
- I Western blot analysis for Figure 1I.
- J Western blot analysis for Figure 1J.
- K Western blot analysis for Figure 1K.
- L Western blot analysis for Figure 1L.
- M Western blot analysis for Figure 1M.
- N Western blot analysis for Figure 1N.
- O Western blot analysis for Figure 1O.

**Appendix Figure S2. Dose-titrations of different stimuli.**

- A Dose-dependent activation of IFN- $\beta$  promoter activity by SeV infection was suppressed by transfection of Myc-SIRT5 (200 ng) in HEK293T cells.
- B Dose-dependent activation of ISRE reporter activity by transfection of increasing amount of Myc-MDA5 (100ng, 200 ng) was suppressed by co-transfection of Myc-SIRT5 (200 ng) in HEK293T cells.
- C Dose-dependent activation of ISRE reporter activity by transfection of Myc-IRF3 (100ng, 200 ng) was not suppressed by co-transfection of Myc-SIRT5 (200 ng) in HEK293T cells.
- D Western blot analysis for A.
- E Western blot analysis for B.
- F Western blot analysis for C.
- G Activation of ISRE reporter activity by transfection of HA-cGAS (100 ng) together with Flag-STING (100ng) was not suppressed by co-transfection of Myc-SIRT5 (200 ng) in HEK293T cells.

H Activation of ISRE reporter activity by transfection of HA-MAVS (200 ng) was not suppressed by co-transfection of Myc-SIRT2 (100ng or 200 ng) in HEK293T cells.

I Activation of IFN- $\beta$  promoter activity by transfection of HA-MAVS (200 ng) was not suppressed by co-transfection of Myc-SIRT2 (100ng or 200 ng) in HEK293T cells.

J Western blot analysis for G.

K Western blot analysis for H.

L Western blot analysis for I.

**Appendix Figure S3. Confocal microscopy images of endogenous SIRT5 and MAVS localization in H1299 cells and HeLa cells. Mito, Mitotracker. Scale bar = 8  $\mu$ m.**

**Appendix Figure S4 Confocal microscopy images of endogenous SIRT5 and MAVS localization in H1299 cells, Hela cells, *SIRT5*-deficient (*SIRT5*<sup>-/-</sup>) or WT (*SIRT5*<sup>+/+</sup>) H1299 cells, *MAVS*-deficient (*MAVS*<sup>-/-</sup>) or WT (*MAVS*<sup>+/+</sup>) H1299 cells . Scale bar = 8  $\mu$ m.**

A Co-localization of SIRT5 and MAVS in H1299 cells.

B Co-localization of SIRT5 and MAVS in Hela cells.

C Localization of *SIRT5* in *SIRT5*-deficient (*SIRT5*<sup>-/-</sup>) or WT (*SIRT5*<sup>+/+</sup>) H1299 cells.

D Localization of *MAVS* in *MAVS*-deficient (*MAVS*<sup>-/-</sup>) or WT (*MAVS*<sup>+/+</sup>) H1299 cells.

**Appendix Figure S5. *SIRT5* has no obvious effect on MAVS protein level in H1299 cells; the enzyme-deficient mutant of SIRT5 (SIRT5-H158Y) interacts with MAVS, and the K7 succinylation site mutant of MAVS (MAVS-K7R) interacts with SIRT5.**

A Immunoblotting of endogenous MAVS expression in HEK293T cells transfected with an increasing amount of Myc-SIRT5 expression plasmid.

B Immunoblotting of endogenous MAVS expression in *SIRT5*-deficient or WT H1299 cells (*SIRT5*<sup>-/-</sup> or *SIRT5*<sup>+/+</sup>).

C Co-immunoprecipitation analysis (Co-IP) analysis of Flag-SIRT5 and HA-MAVS or HA-MAVS-K7R mutant. HEK293T cells were co-transfected with the indicated plasmids. Anti-HA antibody conjugated agarose beads were used for immunoprecipitation and interaction was detected by immunoblotting with the indicated

antibodies.

D Co-IP analysis of HA-MAVS and Flag-SIRT5 or Flag-SIRT5-H158Y mutant. HEK293T cells were co-transfected with indicated plasmids. Anti-Flag antibody conjugated agarose beads were used for immunoprecipitation and interaction was detected by immunoblotting with the indicated antibodies.

**Appendix Figure S6. *Sirt5* deficiency potentiates the host antiviral immunity in response to poly (I:C) stimulation, but does not potentiate the host antiviral immunity in response to HSV-1 infection.**

A-F qPCR analysis of *Ifnβ* (A), *Ifna1* (B), *Ifna4* (C), *Ifit1* (D), *Cxcl10* (E) and *Cxcl11* (F) mRNA in WT (*Sirt5*<sup>+/+</sup>) or *Sirt5*-deficient (*Sirt5*<sup>-/-</sup>) MEF cells transfected with or without poly(I:C) (poly I:C or UT) for 8 h. UT, un-transfected.

G, H qPCR analysis of *Ifnβ* (G), and *Ifit1* (H) mRNA in WT (*Sirt5*<sup>+/+</sup>) or *Sirt5*-deficient (*Sirt5*<sup>-/-</sup>) MEF cells infected with or without HSV-1 viruses (HSV-1 or UI) for 8h. UI, un-infected.

UI, uninfected; the graphs represent fold-induction relative to the uninfected cells. All data are presented as the mean values based on three independent experiments, and error bars indicate S.E.M.

**Appendix Figure S7. *Sirt5* deficiency potentiates antiviral immune response in bone marrow derived macrophage (BMDM) cells.**

A-E qPCR analysis of *Ifnβ* (A), *Ifna1* (B), *Ifna4* (C), *Cxcl10* (D) and *Ccl5* (E) mRNA in WT (*Sirt5*<sup>+/+</sup>) or *Sirt5*-deficient BMDM cells infected with or without SeV (Sev or UI) for 8 h.

F-J qPCR of *Ifnβ* (F), *Ifna1* (G), *Ifna4* (H), *Cxcl10* (I), and *Cxcl11* (J) mRNA in WT (*Sirt5*<sup>+/+</sup>) or *Sirt5*-deficient (*Sirt5*<sup>-/-</sup>) BMDM cells infected with or without VSV for 8 h (VSV or UI).

UI, uninfected. The graphs represent the fold induction relative to the uninfected WT BMDM cells. All data are presented as the mean values based on three independent experiments, and error bars indicate S.E.M.

# Appendix Figure S1

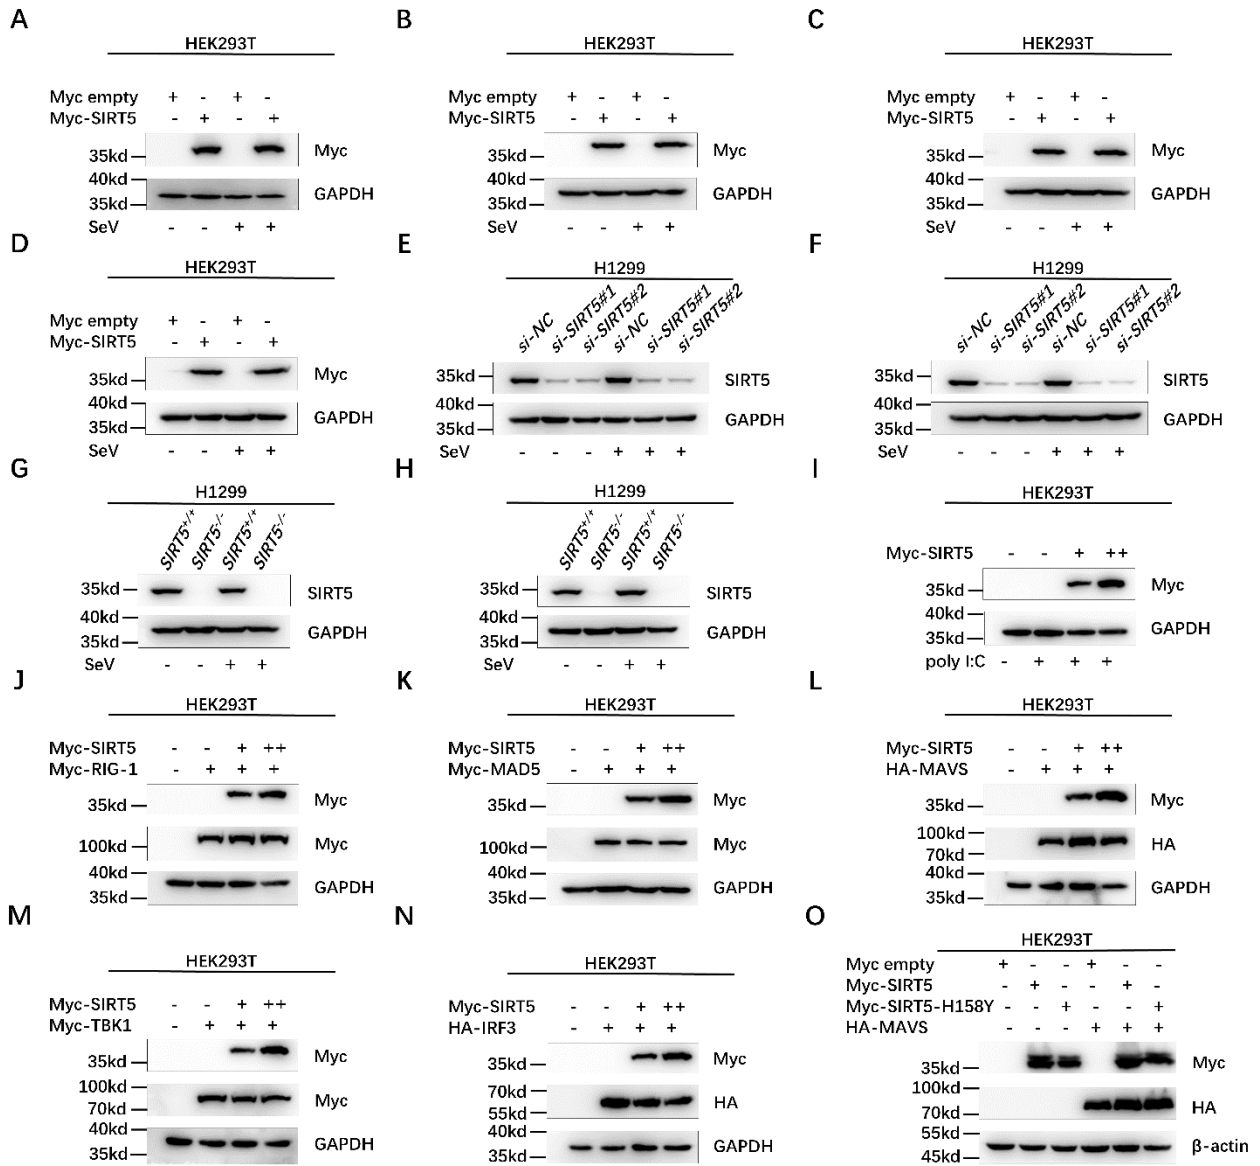

## Appendix Figure S2

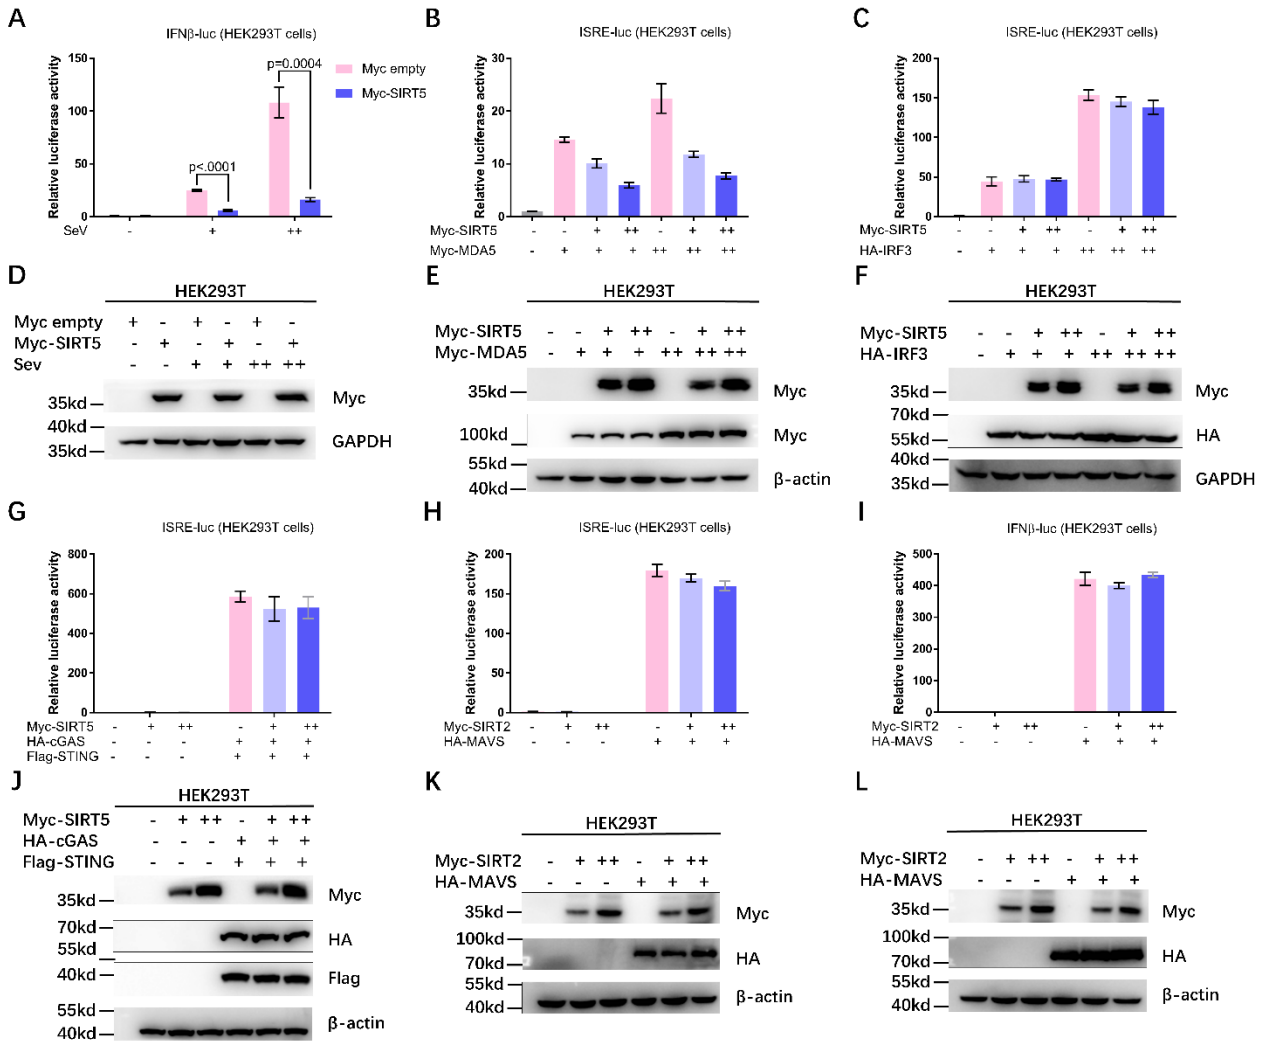

Appendix Figure S3

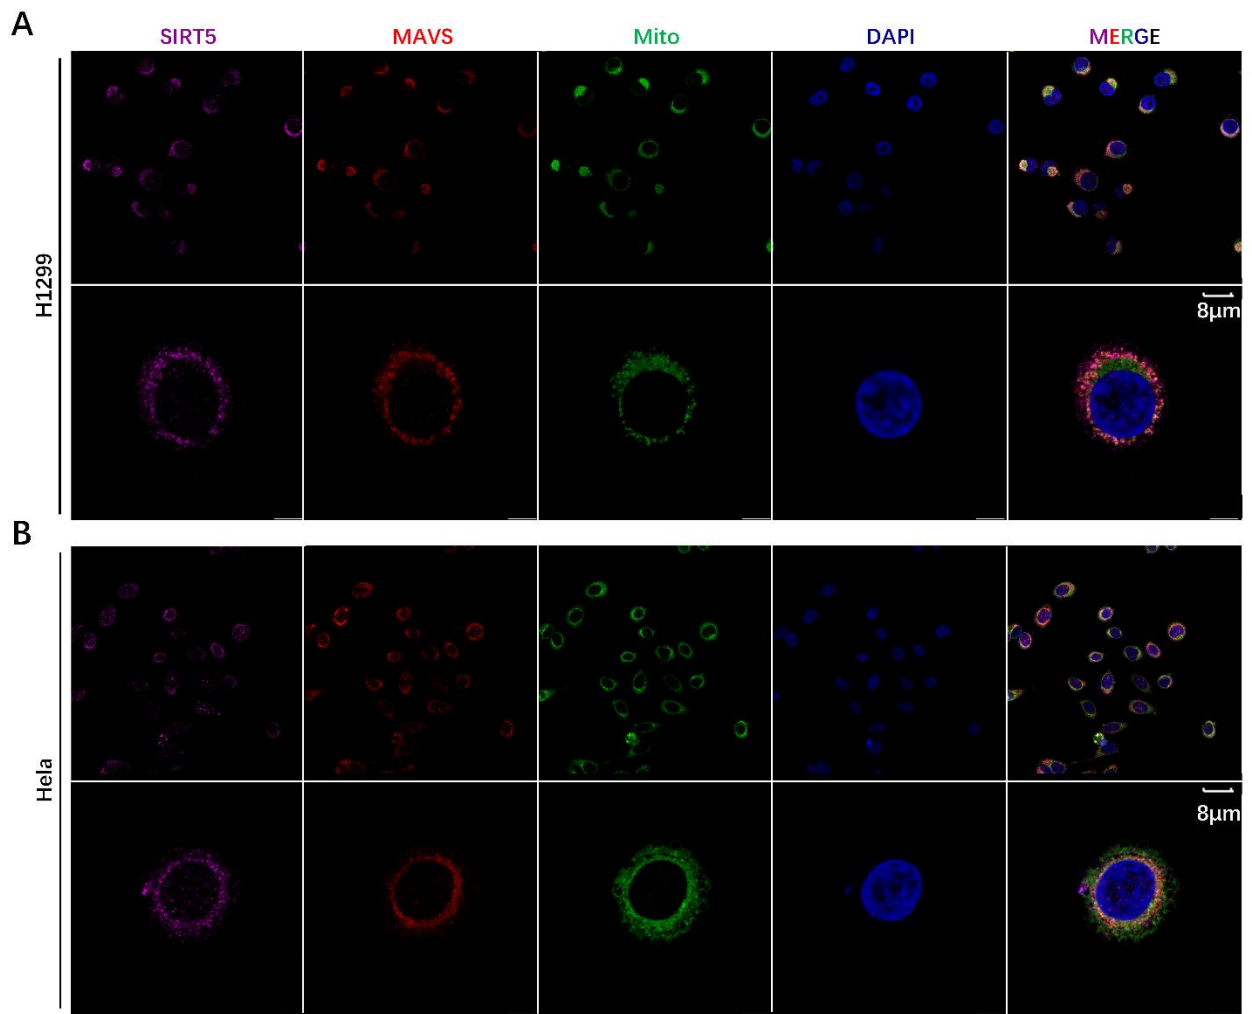

# Appendix Figure S4

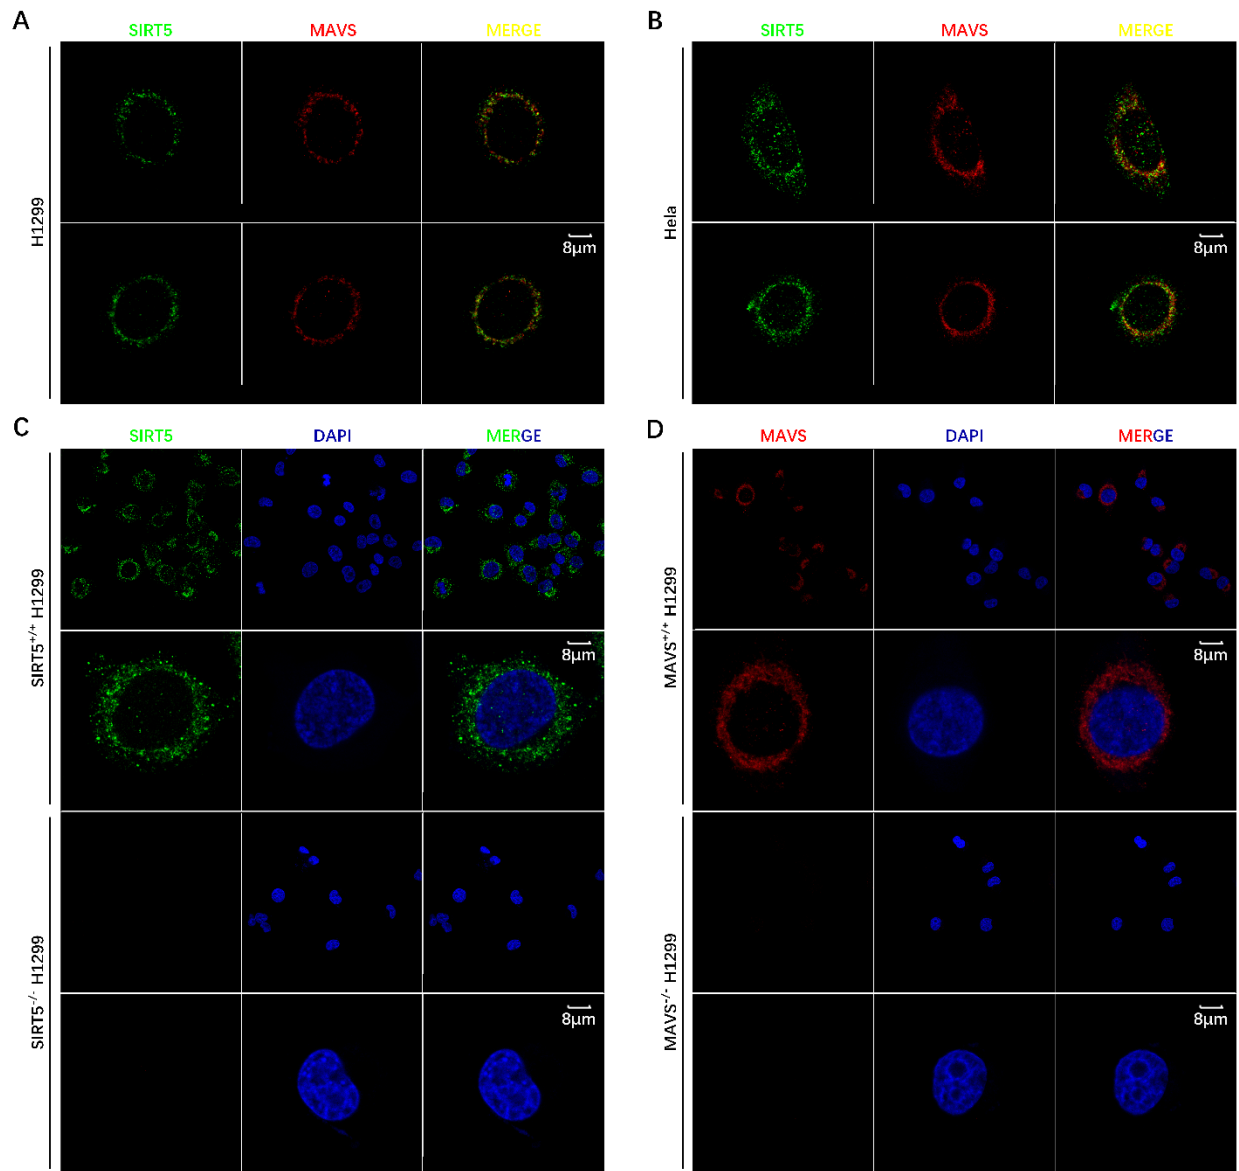



Appendix Figure S5

A

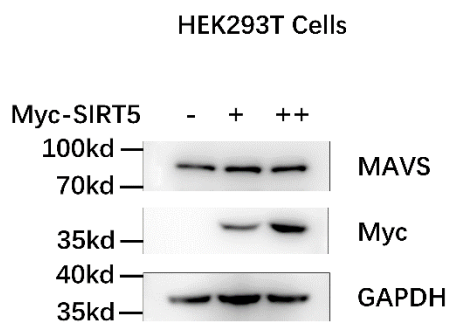

B

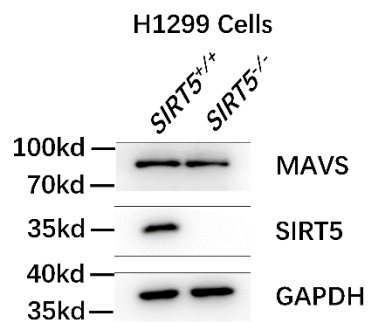

C

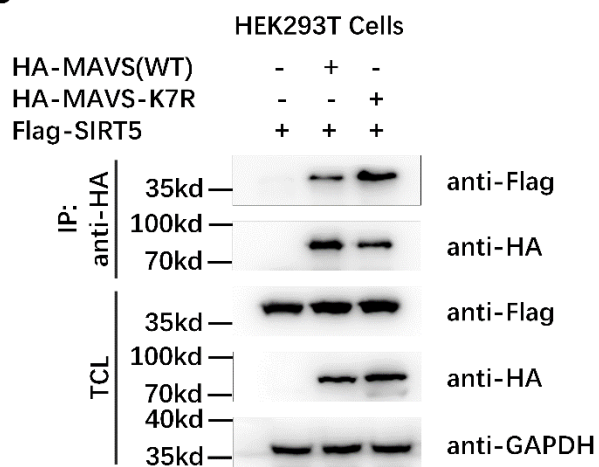

D

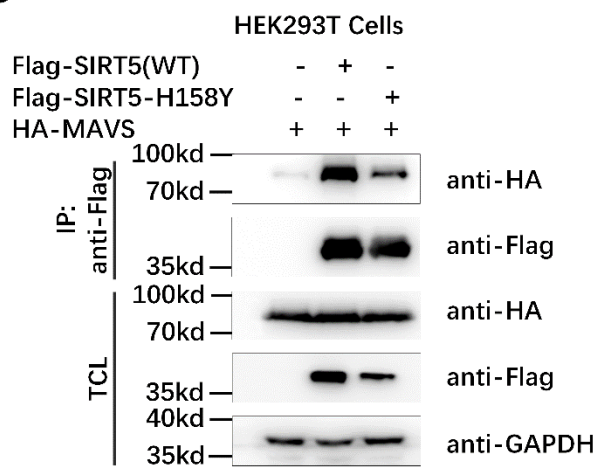

## Appendix Figure S6

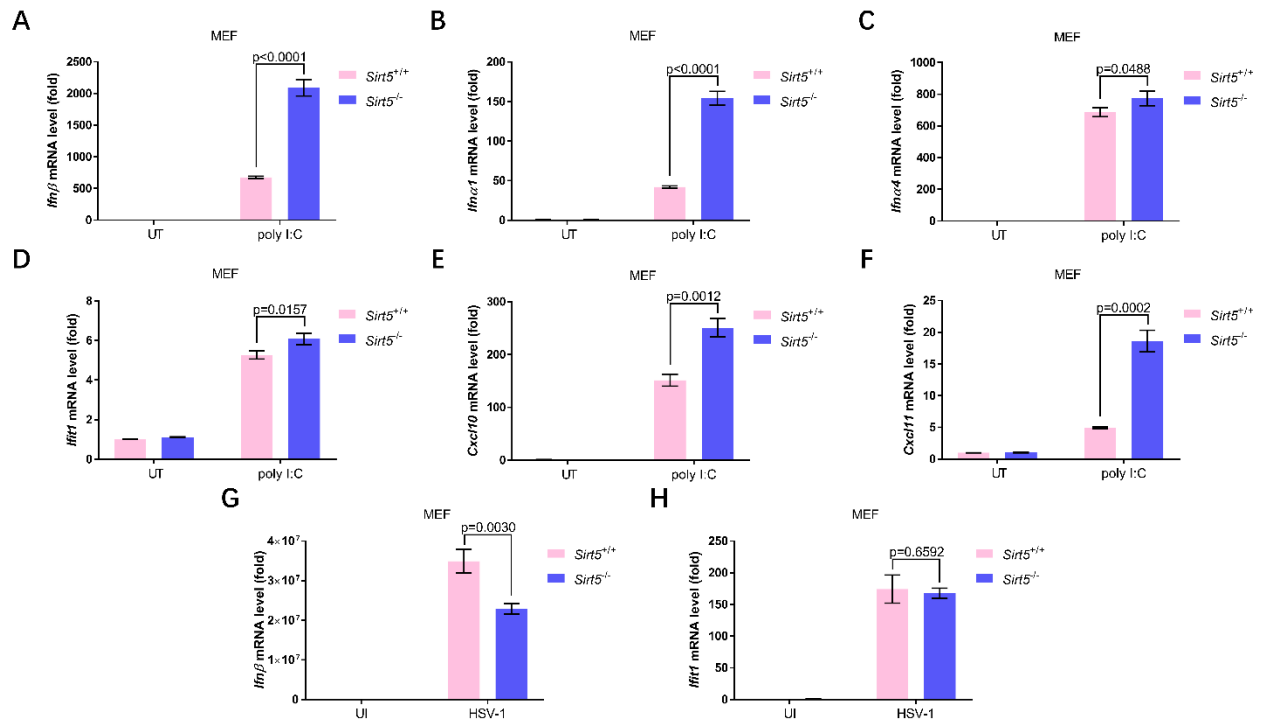

# Appendix Figure S7

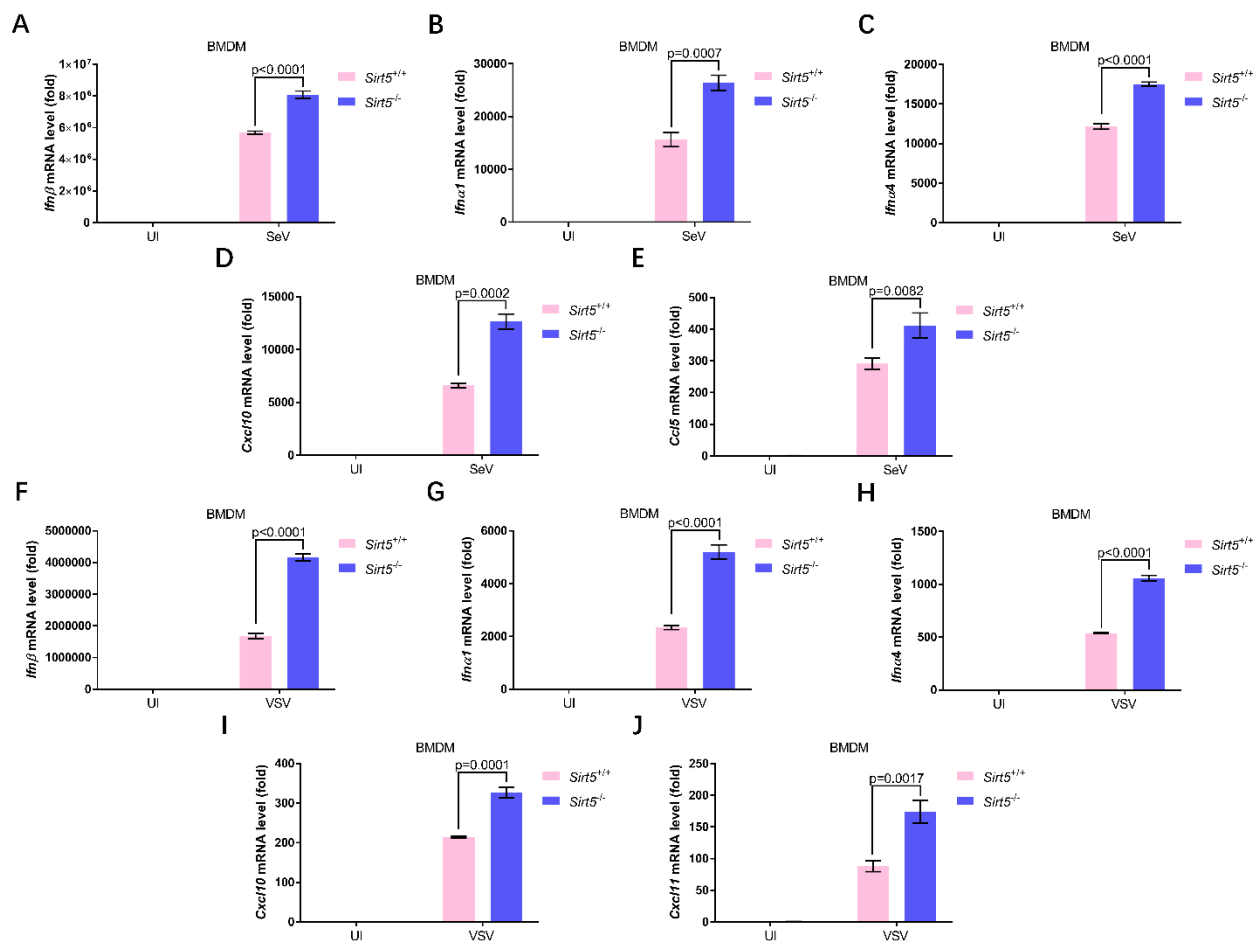

**Appendix Table S1. The reagents and resources**

| REAGENT or RESOURCE                                       | SOURCE                         | IDENTIFIER      |
|-----------------------------------------------------------|--------------------------------|-----------------|
| <b>Antibodies</b>                                         |                                |                 |
| Mouse monoclonal anti-MAVS                                | Santa Cruz                     | Cat #sc-365333  |
| Mouse monoclonal anti-MAVS                                | Santa Cruz                     | Cat #sc-166583  |
| Mouse monoclonal anti-Myc                                 | Santa Cruz                     | Cat #sc-40      |
| Mouse monoclonal anti-GAPDH                               | Santa Cruz                     | Cat #sc-47724   |
| Mouse monoclonal anti-HA                                  | Covance                        | Cat #901515     |
| Mouse monoclonal anti-Flag                                | Sigma-Aldrich                  | Cat #F1804      |
| Rabbit polyclonal anti-SIRT5                              | Sigma-Aldrich                  | Cat #HPA022002  |
| Rabbit polyclonal anti-SIRT5                              | Sigma-Aldrich                  | Cat #HPA021798  |
| Rabbit polyclonal anti-SIRT5                              | Frdbio Bioscience & Technology | This paper      |
| Rabbit polyclonal anti-succi-K7-MAVS                      | Abclonal                       | This paper      |
| Rabbit polyclonal anti-pan-succinyl-K                     | PTM Company                    | Cat #PTM-401    |
| Rabbit monoclonal anti-histone H3                         | Cell Signaling Technology      | Cat #4499S      |
| Alexa Fluor 594 goat anti-mouse IgG                       | ThermoFisher Scientific        | Cat #A11005     |
| Alexa Fluor 647 goat anti-rabbit IgG                      | ThermoFisher Scientific        | Cat #A21245     |
| Rabbit monoclonal anti-IRF3                               | Cell Signaling Technology      | Cat #4302S      |
| Rabbit monoclonal anti-Phospho-IRF3 (Ser396)              | Cell Signaling Technology      | Cat #29047S     |
| Rabbit monoclonal anti-RIG-I                              | Cell Signaling Technology      | Cat #3743S      |
| Rabbit monoclonal anti-K63-linkage specific polyubiquitin | Cell Signaling Technology      | Cat#5621S       |
| Mouse monoclonal anti-GFP                                 | Abclonal                       | Cat#AE012;      |
| Rabbit monoclonal anti-TOM20                              | Abclonal                       | Cat# A19403     |
| Rabbit polyconal anti-LMNB1                               | Abclonal                       | Cat# A16909     |
| <b>Bacterial and Virus Strains</b>                        |                                |                 |
| <i>DH5α</i>                                               | Transgen Biotech               | Cat #CD201      |
| <i>Rosetta</i>                                            | Transgen Biotech               | Cat #CB108      |
| <i>SeV</i>                                                | Bo Zhong Lab                   |                 |
| <i>VSV-GFP</i>                                            | Mingzhou Chen Lab              |                 |
| <i>HSV-1</i>                                              | Chunfu Zheng Lab               |                 |
| <b>Chemicals, Peptides, and Recombinant Proteins</b>      |                                |                 |
| Poly I:C                                                  | Invivogen                      | Cat #tlrl-piclv |
| Recombinant Human GM-CSF                                  | PeptoTech                      | Cat #315-03     |

|                                                                   |                                              |                  |
|-------------------------------------------------------------------|----------------------------------------------|------------------|
| Recombinant Human M-CSF                                           | PeproTech                                    | Cat #315-02      |
| succinyl-CoA                                                      | Sigma-Aldrich                                | Cat #S1129       |
| Critical Commercial Assays                                        |                                              |                  |
| Anti-HA Ab-conjugated agarose beads                               | Sigma-Aldrich                                | Cat #A2095       |
| Anti-Myc Ab-conjugated agarose beads                              | Sigma-Aldrich                                | Cat #A7470       |
| Anti-Flag Ab-conjugated agarose beads                             | Sigma-Aldrich                                | Cat #A2220       |
| Protein G Sepharose                                               | GE HealthCare Company                        | Cat #17-0618-01  |
| Dual-luciferase reporter assay system                             | Promega                                      | Cat #E194A       |
| Mouse Ifn- $\beta$ ELISA kit                                      | LEGEND MAX                                   | Cat #439408      |
| Succinate Assay kit                                               | Abcam                                        | Cat# ab204718    |
| Experimental Models: Cell Lines                                   |                                              |                  |
| HEK293T                                                           | ATCC                                         | Cat #CRL-11268   |
| H1299                                                             | Cell Bank of the Chinese Academy of Sciences | N/A              |
| HCT116                                                            | Cell Bank of the Chinese Academy of Sciences | N/A              |
| SIRT5-knockout H1299                                              | This paper                                   | N/A              |
| SIRT5-knockout HCT116                                             | This paper                                   | N/A              |
| MAVS-knockout H1299                                               | This paper                                   | N/A              |
| Experimental Models: Organisms/Strains                            |                                              |                  |
| B6;129- <i>Sirt5<sup>tm1Fwa</sup></i>                             | The Jackson Laboratory                       | JAX stock 012757 |
| Oligonucleotides                                                  |                                              |                  |
| siRNA targeting sequence: SIRT5#1:<br>5'-GCCCTTGAACATTTCCCAATG-3' | Genepharma                                   | N/A              |
| siRNA targeting sequence: SIRT5#2:<br>5'-GCATTAGAACTACAGACAAC-3'  | Genepharma                                   | N/A              |
| Recombinant DNA                                                   |                                              |                  |
| Plasmid: pCMV-Myc                                                 | Clontek                                      | Cat #K6003-1     |
| Plasmid: pCMV-HA                                                  | Clontek                                      | Cat #631604      |
| Plasmid: pCMV-Flag                                                | This paper                                   | N/A              |
| Plasmid: pCMV-Myc-SIRT5                                           | This paper                                   | N/A              |
| Plasmid: pCMV-Myc-SIRT5-H158Y                                     | This paper                                   | N/A              |
| Plasmid: pCMV-HA-SIRT5                                            | This paper                                   | N/A              |

|                                        |                        |                                                                                                                       |
|----------------------------------------|------------------------|-----------------------------------------------------------------------------------------------------------------------|
| Plasmid: pCMV-Flag-SIRT5               | This paper             | N/A                                                                                                                   |
| Plasmid: pCMV-Flag-SIRT5-H158Y         | This paper             | N/A                                                                                                                   |
| Plasmid: pCMV-HA-MAVS                  | This paper             | N/A                                                                                                                   |
| Plasmid: pCMV-HA-MAVS-K7R              | This paper             | N/A                                                                                                                   |
| Plasmid: pCMV-Flag-MAVS                | This paper             | N/A                                                                                                                   |
| Plasmid: pCMV-Flag-MAVS- $\Delta$ C1   | This paper             | N/A                                                                                                                   |
| Plasmid: pCMV-Flag-MAVS- $\Delta$ C2   | This paper             | N/A                                                                                                                   |
| Plasmid: pCMV-Flag-MAVS- $\Delta$ N1   | This paper             | N/A                                                                                                                   |
| Plasmid: pCMV-Flag-MAVS- $\Delta$ N2   | This paper             | N/A                                                                                                                   |
| Plasmid: pCMV-Flag-MAVS- $\Delta$ CARD | This paper             | N/A                                                                                                                   |
| Plasmid: pCMV-Flag-MAVS- $\Delta$ PR   | This paper             | N/A                                                                                                                   |
| Plasmid: pCMV-Flag-MAVS- $\Delta$ TM   | This paper             | N/A                                                                                                                   |
| Plasmid: pGEX-2T                       | GE Life Sciences       | Cat #28-9546-53                                                                                                       |
| Plasmid: pET-32 $\alpha$               | Novagen                | Cat #69015-3                                                                                                          |
| Plasmid: pGEX-2T-MAVS                  | This paper             | N/A                                                                                                                   |
| Plasmid: pET-32 $\alpha$ -SIRT5        | This paper             | N/A                                                                                                                   |
| Plasmid: pCMV-Myc-MDA5                 | This paper             | N/A                                                                                                                   |
| Plasmid: pCMV-Myc-RIG-I                | This paper             | N/A                                                                                                                   |
| Plasmid: pCMV-Myc-TBK1                 | This paper             | N/A                                                                                                                   |
| Plasmid: pCMV-HA-IRF3                  | This paper             | N/A                                                                                                                   |
| Plasmid: pCMV-HA-c-GAS                 | This paper             | N/A                                                                                                                   |
| Plasmid: pCMV-Flag-STING-              | This paper             | N/A                                                                                                                   |
| Plasmid: pCMV-Myc-SIRT2                | This paper             | N/A                                                                                                                   |
| Plasmid: pCI-His-Ub                    | This paper             | N/A                                                                                                                   |
| Plasmid: pCI-His-Ub-K63                | This paper             | N/A                                                                                                                   |
|                                        |                        |                                                                                                                       |
| <b>Software and Algorithms</b>         |                        |                                                                                                                       |
| ImageJ                                 | Schneider et al., 2012 | <a href="https://imagej.nih.gov/ij/">https://imagej.nih.gov/ij/</a>                                                   |
| GraphPad Prism                         |                        | <a href="https://www.graphpad.com/scientific-software/prism/">https://www.graphpad.com/scientific-software/prism/</a> |
| FlowJo                                 |                        | <a href="https://www.flowjo.com/">https://www.flowjo.com/</a>                                                         |

**Appendix Table S2. The primer sequences**

| Primers                             | Sequence (5' to 3')       |
|-------------------------------------|---------------------------|
| Human- <i>GAPDH</i> -RT-F           | ATGACATCAAGAAGGTGGTG      |
| Human- <i>GAPDH</i> -RT-R           | CATACCAGGAAATGAGCTTG      |
| Human- <i>IFN</i> $\beta$ -RT-F     | ACGCCGCATTGACCATCTATG     |
| Human- <i>IFN</i> $\beta$ -RT-R     | CGGAGGTAACCTGTAAGTCTGT    |
| Human- <i>CXCL10</i> -RT-F          | GCTCTACTGAGGTGCTATGTTC    |
| Human- <i>CXCL10</i> -RT-R          | GGAGGATGGCAGTGGAAAGTC     |
| Human- <i>IFIT1</i> -RT-F           | CCTCCTTGGGTTCGTCTACA      |
| Human- <i>IFIT1</i> -RT-R           | GGCTGATATCTGGGTGCCTA      |
| Human- <i>ISG15</i> -RT-F           | GAGAGGCAGCGAACTCATCTT     |
| Human- <i>ISG15</i> -RT-R           | CCAGCATCTTCACCGTCAGG      |
| Mouse- $\beta$ - <i>actin</i> -RT-F | TGGAATCCTGTGGCATCCATGAAAC |
| Mouse- $\beta$ - <i>actin</i> -RT-R | TAAAACGCAGCTCAGTAACAGTCCG |
| Mouse- <i>Ifn</i> $\beta$ -RT-F     | TACAACAGATACGCCTGGAT      |
| Mouse- <i>Ifn</i> $\beta$ -RT-R     | AGTCCGCCTCTGATGCTTAA      |
| Mouse- <i>Ifit1</i> -RT-F           | CCAAGTGTTCCAATGCTCCT      |
| Mouse- <i>Ifit1</i> -RT-R           | GGATGGAATTGCCTGCTAGA      |
| Mouse- <i>Cxcl10</i> -RT-F          | CCAAGTGCTGCCGTCATTTT      |
| Mouse- <i>Cxcl10</i> -RT-R          | GATAGGCTCGCAGGGATGAT      |
| Mouse- <i>Cxcl11</i> -RT-F          | GTCATAGCCACACTCAAGAA      |
| Mouse- <i>Cxcl11</i> -RT-R          | AGACAGGTGCCATCAGAG        |
| Mouse- <i>Ccl5</i> -RT-F            | CCTCACCATATGGCTCGGAC      |
| Mouse- <i>Ccl5</i> -RT-R            | TCTTCTCTGGGTTGGCACAC      |
| Mouse- <i>Ifna</i> -RT-F            | CCTTCCACAGGATCACTGTGTACCT |
| Mouse- <i>Ifna</i> -RT-R            | TTCTGCTCTGACCACCTCCC      |
| Mouse- <i>Ifna4</i> -RT-F           | AGGATCACTGTGTACCTGAGA     |
| Mouse- <i>Ifna4</i> -RT-R           | TCTCCACACTTTGTCTCAGGA     |
| Mouse- <i>Isg15</i> -RT-F           | CCTCTGAGCATCCTGGTGAG      |
| Mouse- <i>Isg15</i> -RT-R           | ACTGGTCTTCGTGGACTTGTT     |
| Mouse- <i>Rig-I</i> -RT-F           | ATTGTCGGCGTCCACAAAG       |
| Mouse- <i>Rig-I</i> -RT-R           | GTGCATCGTTGTATTTCGCA      |
| Mouse- <i>Irf7</i> -RT-F            | GAGACTGGCTATTGGGGGAG      |
| Mouse- <i>Irf7</i> -RT-R            | GACCGAAATGCTTCCAGGG       |
