# Supplementary material
Source: PubMed Central journal article supplement (PMC7265249)

**Figure 2**

**B**

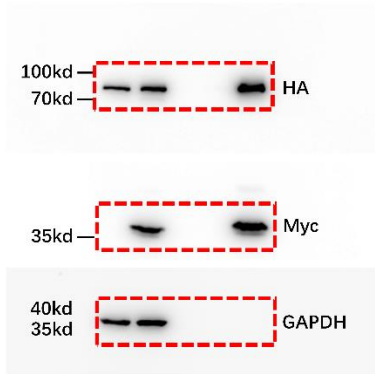

**C**

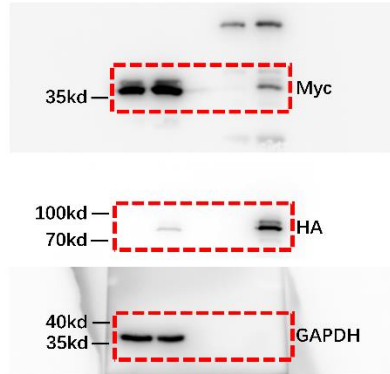

**D**

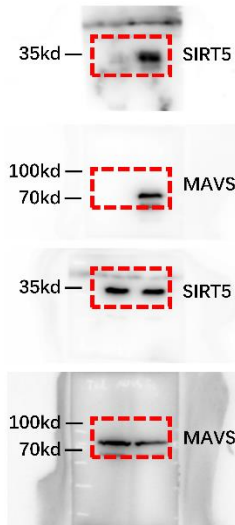

**E**

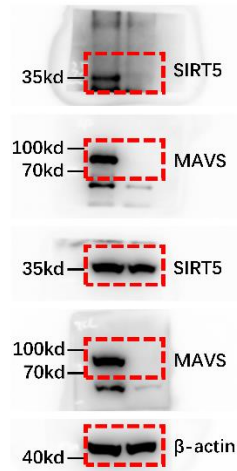

**F**

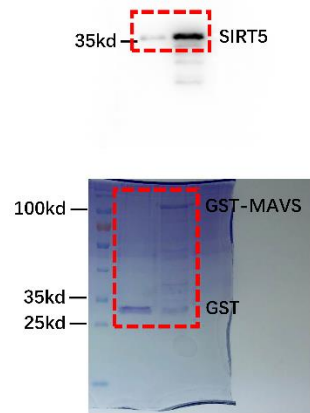

**H**

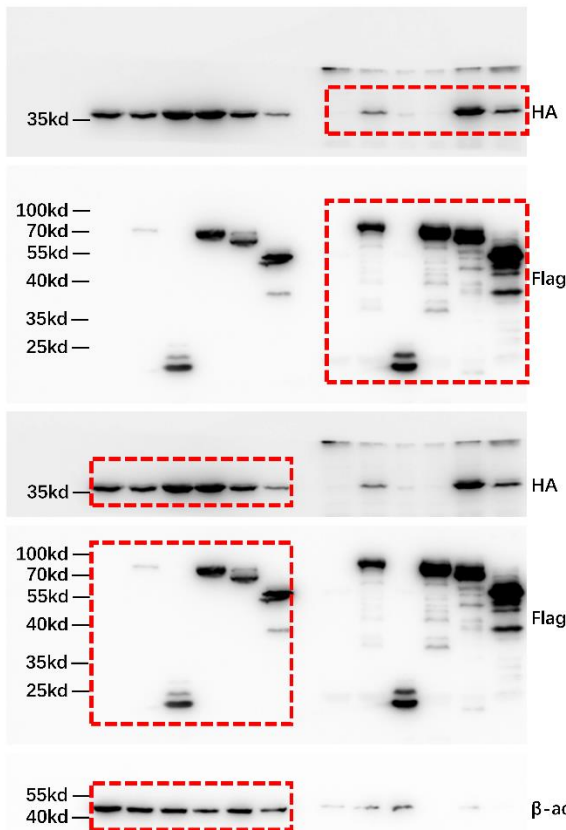

**I**

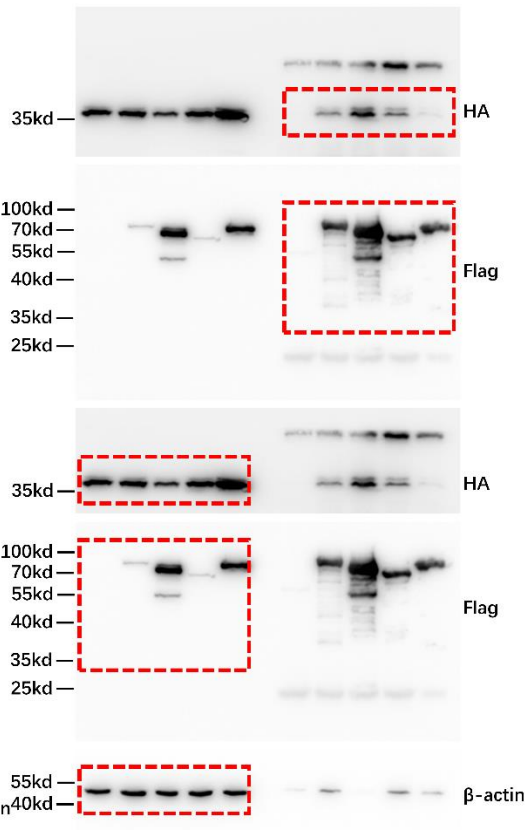

Supplement: EMBJ-39-e103285-s003.pdf [file EMBJ-39-e103285-s003.pdf]

**Figure 3**

**A**

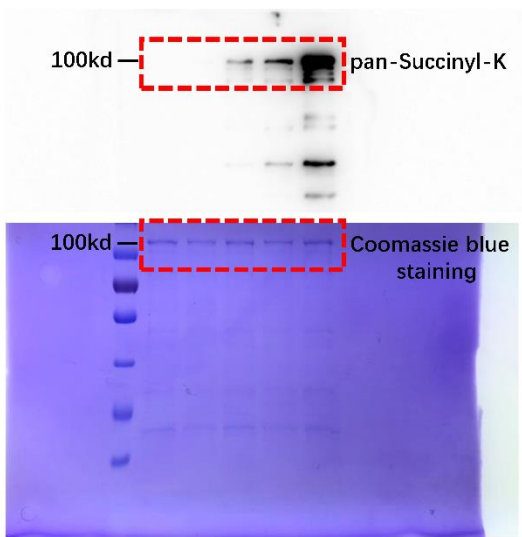

**B**

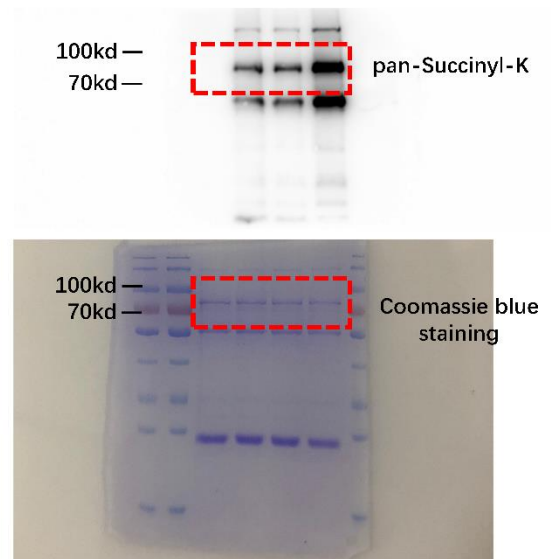

**F**

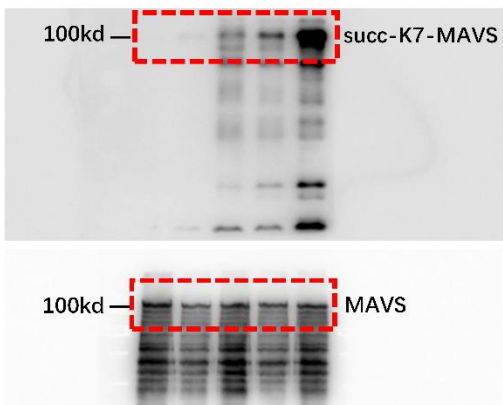

**G**

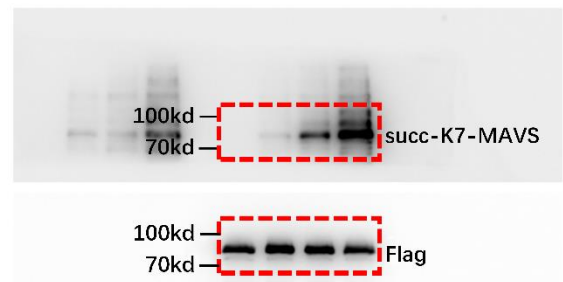

**Figure 3**

**H**

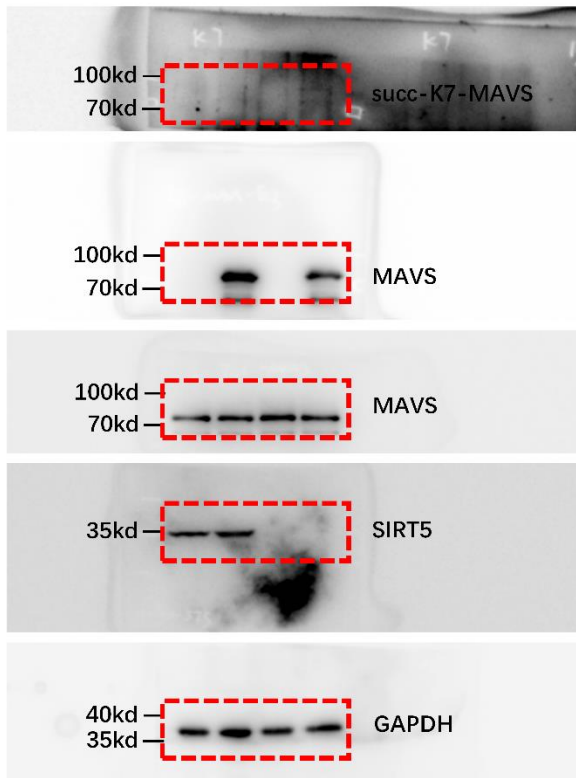

**I**

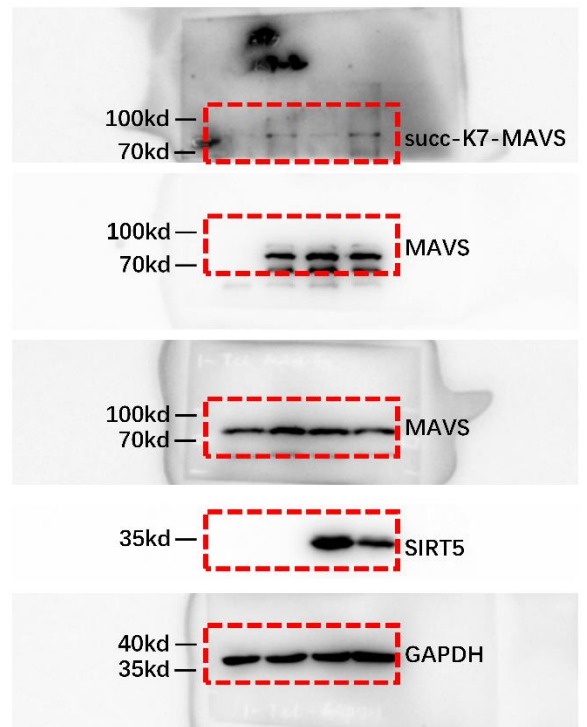

**J**

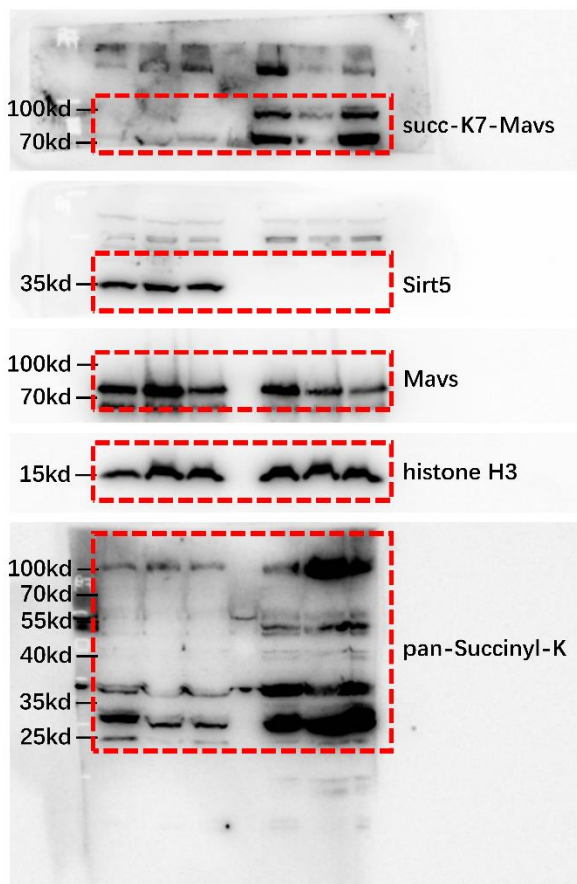

**K**

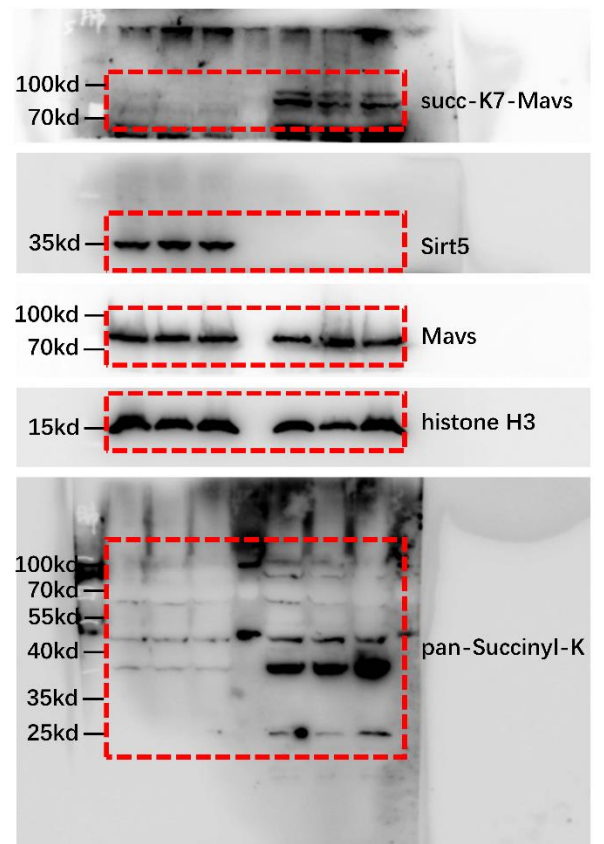

Supplement: EMBJ-39-e103285-s004.pdf [file EMBJ-39-e103285-s004.pdf]

**Figure 4**

**L**

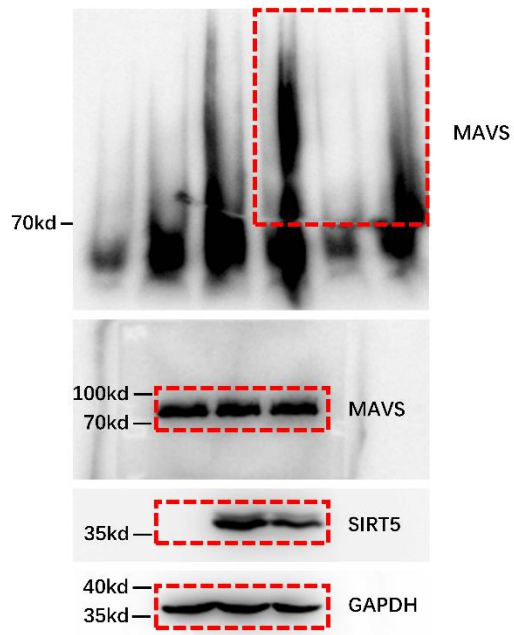

**P**

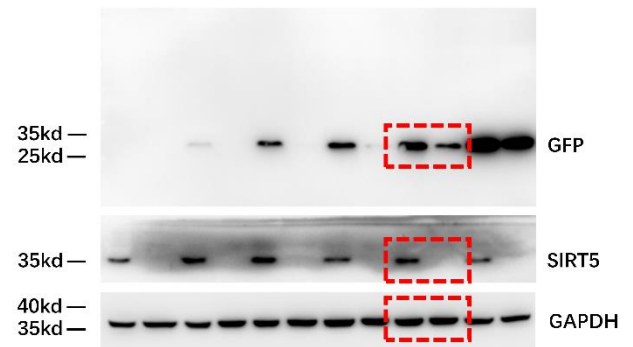

Supplement: EMBJ-39-e103285-s005.pdf [file EMBJ-39-e103285-s005.pdf]

Figure 5

G

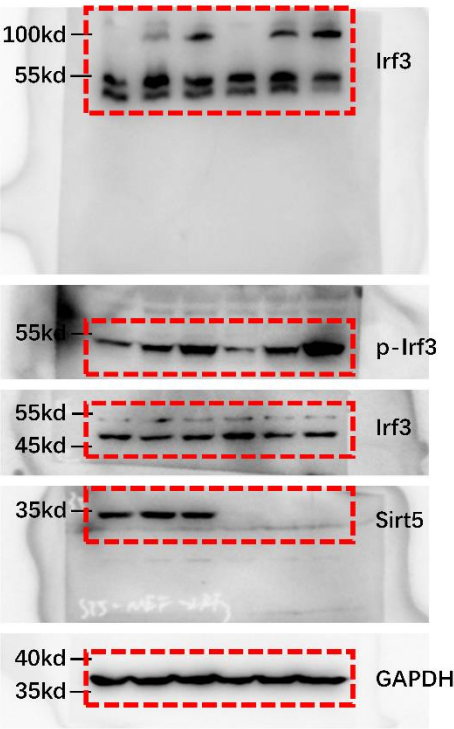

H

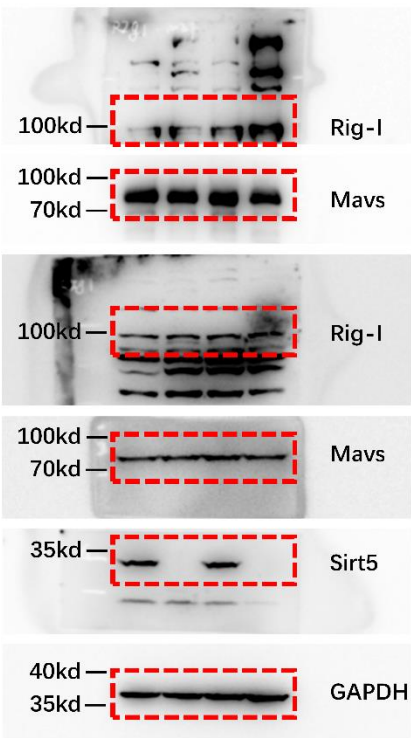

I

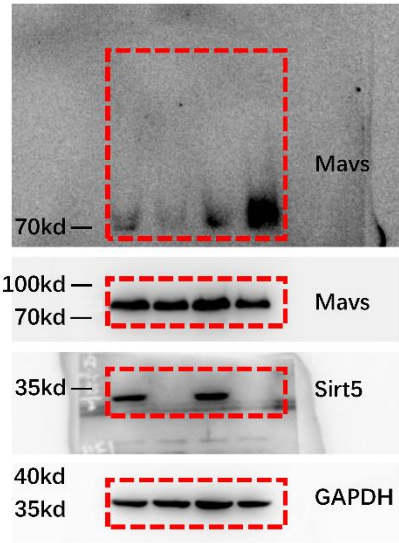

Q

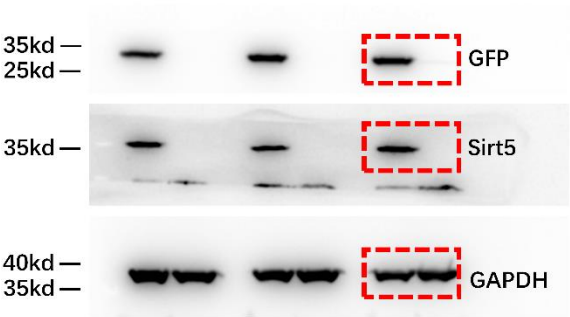

Supplement: EMBJ-39-e103285-s006.pdf [file EMBJ-39-e103285-s006.pdf]
